# Supplementary material
Source: Elsevier journal article supplement (https://www.sciencedirect.com/science/article/pii/S1885585721000670)

## **SUPPLEMENTARY DATA**

### **Definition and adjudication of adverse events**

Two data managers independently reviewed the clinical history of each patient to identify events. All suspected events were independently reviewed by 2 specialists in the clinically relevant areas of cardiology and internal medicine. Both data managers and specialists underwent a study-specific training course on event definitions and the adjudication process. Finally, an independent clinical events committee revised and adjudicated all events.

- Cardiovascular death includes death resulting from acute myocardial infarction, sudden cardiac death, death due to heart failure, death due to stroke, death due to cardiovascular procedures, death due to cardiovascular hemorrhage, and death due to other cardiovascular causes.
- Ischemic stroke was defined as sudden onset of a focal deficit consistent with occlusion of a major cerebral artery (documented by means of magnetic resonance imaging or computed tomography). Signs or symptoms had to last > 24 hours, unless supported by clear evidence of cerebral infarction on imaging techniques (eg, diffusion-weighted magnetic resonance imaging).
- Transient ischemic attack was defined as a temporary neurologic deficit presumably due to reduced blood flow in a specific cerebral artery lasting for ≤ 24 hours with complete resolution of the neurologic deficit and no acute infarction.
- Pulmonary embolism was considered verified and recorded when the presence of clinical signs and symptoms of pulmonary embolism was combined with objective confirmatory tests (spiral

computed tomography, perfusion-ventilation scan, pulmonary angiography, or autopsy) and resulted in a diagnosis of pulmonary embolism.

- Systemic embolism (SE) was defined as any end-organ ischemia other than in the brain, heart, eyes, and lungs caused by abrupt vascular insufficiency associated with clinical or radiological evidence of arterial occlusion in the absence of another likely mechanism (eg, atherosclerosis, instrumentation, or trauma), and objectively documented by duplex scanning, computed tomography, magnetic resonance imaging, or angiography. SE included arterial embolism in the lower extremities, upper extremities, and visceral-mesenteric system.
- Major bleeding (MB) episodes were defined as fatal bleeding, symptomatic bleeding in a critical area or organ, or bleeding causing a reduced hemoglobin level of 2 g/dL or more or leading to transfusion of 2 or more units of whole blood or red cells.
- Clinically relevant nonmajor bleeding (non-MB) was defined as any sign or symptom of hemorrhage that did not fit the criteria for the International Society on Thrombosis and Haemostasis definition of major bleeding but that required medical intervention by a health care professional, led to hospitalization or an increased level of care, or prompted a face-to-face evaluation.

**Table 1 of the supplementary data**

Univariate analysis for all-cause mortality

| Variables                            | HR   | 95%CI     | P      |
|--------------------------------------|------|-----------|--------|
| <i>Patient characteristics</i>       |      |           |        |
| Age, per y                           | 1.13 | 1.12-1.14 | < .001 |
| Female sex                           | 0.91 | 0.85-0.98 | .012   |
| Obesity <sup>a</sup>                 | 0.64 | 0.59-0.69 | < .001 |
| <i>Cardiovascular risk factors</i>   |      |           |        |
| Hypertension                         | 0.92 | 0.86-0.98 | .019   |
| Diabetes mellitus                    | 1.15 | 1.06-1.26 | .001   |
| Dyslipidemia                         | 0.65 | 0.61-0.70 | < .001 |
| Peripheral artery disease            | 1.75 | 1.49-2.04 | < .001 |
| Ischemic heart disease               | 1.21 | 1.09-1.35 | < .001 |
| Prior heart failure                  | 2.12 | 1.90-2.36 | < .001 |
| Prior ischemic stroke                | 1.44 | 1.28-1.62 | < .001 |
| Prior non-CNS embolic events         | 1.93 | 1.44-2.58 | < .001 |
| <i>Comorbidities</i>                 |      |           |        |
| Prior bleeding admission             | 1.07 | 0.91-1.27 | .395   |
| Anemia in previous year <sup>b</sup> | 2.27 | 2.11-2.43 | < .001 |
| GFR < 60 mL/min/1.73 m <sup>2c</sup> | 1.78 | 1.66-1.91 | < .001 |
| COPD                                 | 1.30 | 1.18-1.44 | <.001  |
| Cancer                               | 1.22 | 1.08-1.39 | .002   |
| Dementia                             | 1.54 | 1.40-1.70 | < .001 |
| Malnutrition <sup>d</sup>            | 1.88 | 1.75-2.02 | < .001 |

| <i>Echocardiographic data</i>                       |      |           |        |
|-----------------------------------------------------|------|-----------|--------|
| LVEF < 40%                                          | 1.59 | 1.39-1.82 | < .001 |
| Severe aortic valve disease                         | 1.53 | 1.34-1.75 | < .001 |
| Severe mitral valve disease                         | 1.41 | 1.21-1.64 | < .001 |
| <i>Medical therapy</i>                              |      |           |        |
| Anticoagulation                                     | 0.55 | 0.51-0.60 | < .001 |
| Antiplatelet therapy                                | 1.61 | 1.48-1.75 | < .001 |
| Antiarrhythmic drug                                 | 0.71 | 0.60-0.83 | < .001 |
| Beta-blocker                                        | 0.79 | 0.73-0.85 | < .001 |
| Verapamil/diltiazem                                 | 0.73 | 0.60-0.88 | .0001  |
| Digoxin                                             | 1.48 | 1.36-1.62 | < .001 |
| ACEI/ARB                                            | 0.78 | 0.73-0.83 | < .001 |
| Statin                                              | 0.67 | 0.62-0.72 | < .001 |
| <i>Risk scores</i>                                  |      |           |        |
| CHA <sub>2</sub> DS <sub>2</sub> -VASc, per 1 point | 1.12 | 1.09-1.16 | < .001 |
| HAS-BLED, per 1 point                               | 1.20 | 1.16-1.24 | < .001 |

ACEI, angiotensin-converting enzyme inhibitor; ARB, angiotensin receptor blocker; CI, confidence interval; CNS, central nervous system; COPD, chronic obstructive pulmonary disease; GFR, glomerular filtration rate; HR, hazard ratio; LVEF, left ventricular ejection fraction.

<sup>a</sup> Obesity was defined as a body mass index  $\geq 30$  kg/m<sup>2</sup>.

<sup>b</sup> According to the World Health Organization, anemia was defined as hemoglobin levels < 12.0 g/dL in women and < 13.0 g/dL in men. We did not include anemia following traumatic injuries or surgical treatments.

<sup>c</sup> Glomerular filtration rate was estimated from serum creatinine using the Chronic Kidney Disease Epidemiology Collaboration (CKD-EPI) equation.

<sup>d</sup> Risk of malnutrition was defined as a Controlling Nutritional Status (CONUT) score  $\geq 3$  points.

**Table 2 of the supplementary data**

Bleeding and embolic events in the study population, considering the number (No.), percentage (%), incidence rate (per 100 patients/y), and treatment with anticoagulant drugs at the time of the event

| Event                 | Number of patients | %    | Incidence rate (95%CI) |
|-----------------------|--------------------|------|------------------------|
| <b>Embolic events</b> | 922                | 9.8  | 2.8 (2.6-3.0)          |
| <i>Major embolism</i> | 698                | 7.5  | 2.1 (1.9-2.2)          |
| Stroke                | 538                | 5.7  | 1.6 (1.5-1.7)          |
| Non-CNS embolism      | 178                | 1.9  | 0.5 (0.4-0.6)          |
| <i>TIA</i>            | 276                | 2.9  | 0.8 (0.7-0.9)          |
| <b>Bleeding</b>       | 2,822              | 30.1 | 10.0 (9.6-10.4)        |
| <i>MB</i>             | 827                | 8.8  | 2.5 (2.3-2.7)          |
| ICH                   | 269                | 2.9  | 0.8 (0.7-0.8)          |
| Non-ICH MB            | 579                | 6.2  | 1.7 (1.6-1.9)          |
| <i>Non-MB</i>         | 2,368              | 25.3 | 8.2 (7.9-8.5)          |

CNS, central nervous system; DOAC, direct oral anticoagulants; ICH, intracranial hemorrhage; MB: major bleeding; TIA, transient ischemic attack.

**Table 3 of the supplementary data**

Association between risk of death and bleeding and embolic events by anticoagulation status at the time of each respective event

| Covariate                  | Incidence rate of death <sup>a</sup><br>(95%CI) |               | Adjusted HR<br>for death <sup>b</sup> | <i>P</i> |
|----------------------------|-------------------------------------------------|---------------|---------------------------------------|----------|
|                            | With event                                      | Without event | (95%CI)                               |          |
| <b>Embolism</b>            |                                                 |               |                                       |          |
| <i>ON anticoagulation</i>  | 22.2 (19.5-25.4)                                | 8.8 (8.5-9.1) | 2.47 (2.13-2.85)                      | < .001   |
| VKA                        | 20.5 (17.5-24.1)                                | 8.9 (8.6-9.2) | 2.36 (1.99-2.80)                      | < .001   |
| DOAC                       | 27.6 (21.6-35.1)                                | 9.0 (8.7-9.4) | 2.66 (2.06-3.43)                      | < .001   |
| <i>OFF anticoagulation</i> | 31.7 (26.2-38.5)                                | 8.9 (8.6-9.3) | 1.94 (1.56-2.42)                      | < .001   |
| <b>Bleeding</b>            |                                                 |               |                                       |          |
| <i>ON anticoagulation</i>  | 12.1 (11.3-13.1)                                | 8.6 (8.3-8.9) | 1.84 (1.67-2.03)                      | < .001   |
| VKA                        | 11.2 (10.3-12.2)                                | 8.8 (8.5-9.2) | 1.70 (1.53-1.89)                      | < .001   |
| DOAC                       | 15.9 (13.3-18.2)                                | 9.0 (8.7-9.3) | 1.97 (1.63-2.39)                      | < .001   |
| <i>OFF anticoagulation</i> | 19.2 (16.1-22.8)                                | 9.0 (8.6-9.3) | 1.58 (1.30-1.93)                      | < .001   |

95%CI, confidence interval; CNS, central nervous system; DOAC, direct oral anticoagulants; HR, hazard ratio; ICH, intracranial hemorrhage; MB, major bleeding; TIA, transient ischemic attack; VKA, vitamin K antagonist.

<sup>a</sup> Incidence rate per 100 patients per year.

<sup>b</sup> Adjustments were finally applied for the significant influential characteristics of age, female sex, obesity, cardiovascular risk factors (hypertension, diabetes mellitus, dyslipidemia), peripheral artery disease, ischemic heart disease, prior heart failure, prior embolic events (ischemic stroke and

extracranial embolism), comorbidities (anemia in the last year, glomerular filtrate rate according to Chronic Kidney Disease Epidemiology Collaboration [CKD-EPI] equation  $< 60 \text{ mL/min/1.73 m}^2$ , chronic obstructive pulmonary disease, history of cancer, dementia, risk of malnutrition [Controlling Nutritional Status—CONUT—score  $\geq 3$ ]), echocardiographic data (left ventricular ejection fraction  $< 40\%$ , severe aortic and mitral valve disease), medical therapies (anticoagulation, antiplatelet therapy, antiarrhythmic drugs, beta-blockers, verapamil/diltiazem, digoxin, angiotensin-converting enzyme inhibitors or angiotensin receptor blockers, and statins), and risk scores (CHA<sub>2</sub>DS<sub>2</sub>-VASc and HAS-BLED).



**Figure 1 of the supplementary data.** Differential impact of embolism vs bleeding (MB) on mortality according to anticoagulant therapy. Blue rhombuses and circles represent the magnitude (adjusted hazard ratio [HR]) of the impact on mortality of embolic events (on and off anticoagulation), while red rhombuses and circles represent that of bleeding events (on and off anticoagulation). For patients who received anticoagulation, we analyzed separately those patients treated with vitamin K antagonists (on VKA), and those treated with direct oral anticoagulants (on DOAC). We report the estimate of the relative risk (ratio of the HR) for each comparison. The estimates of the impact of events on mortality are derived from a multivariate model (table 2). DOAC, direct oral anticoagulants; VKA, vitamin K antagonist.

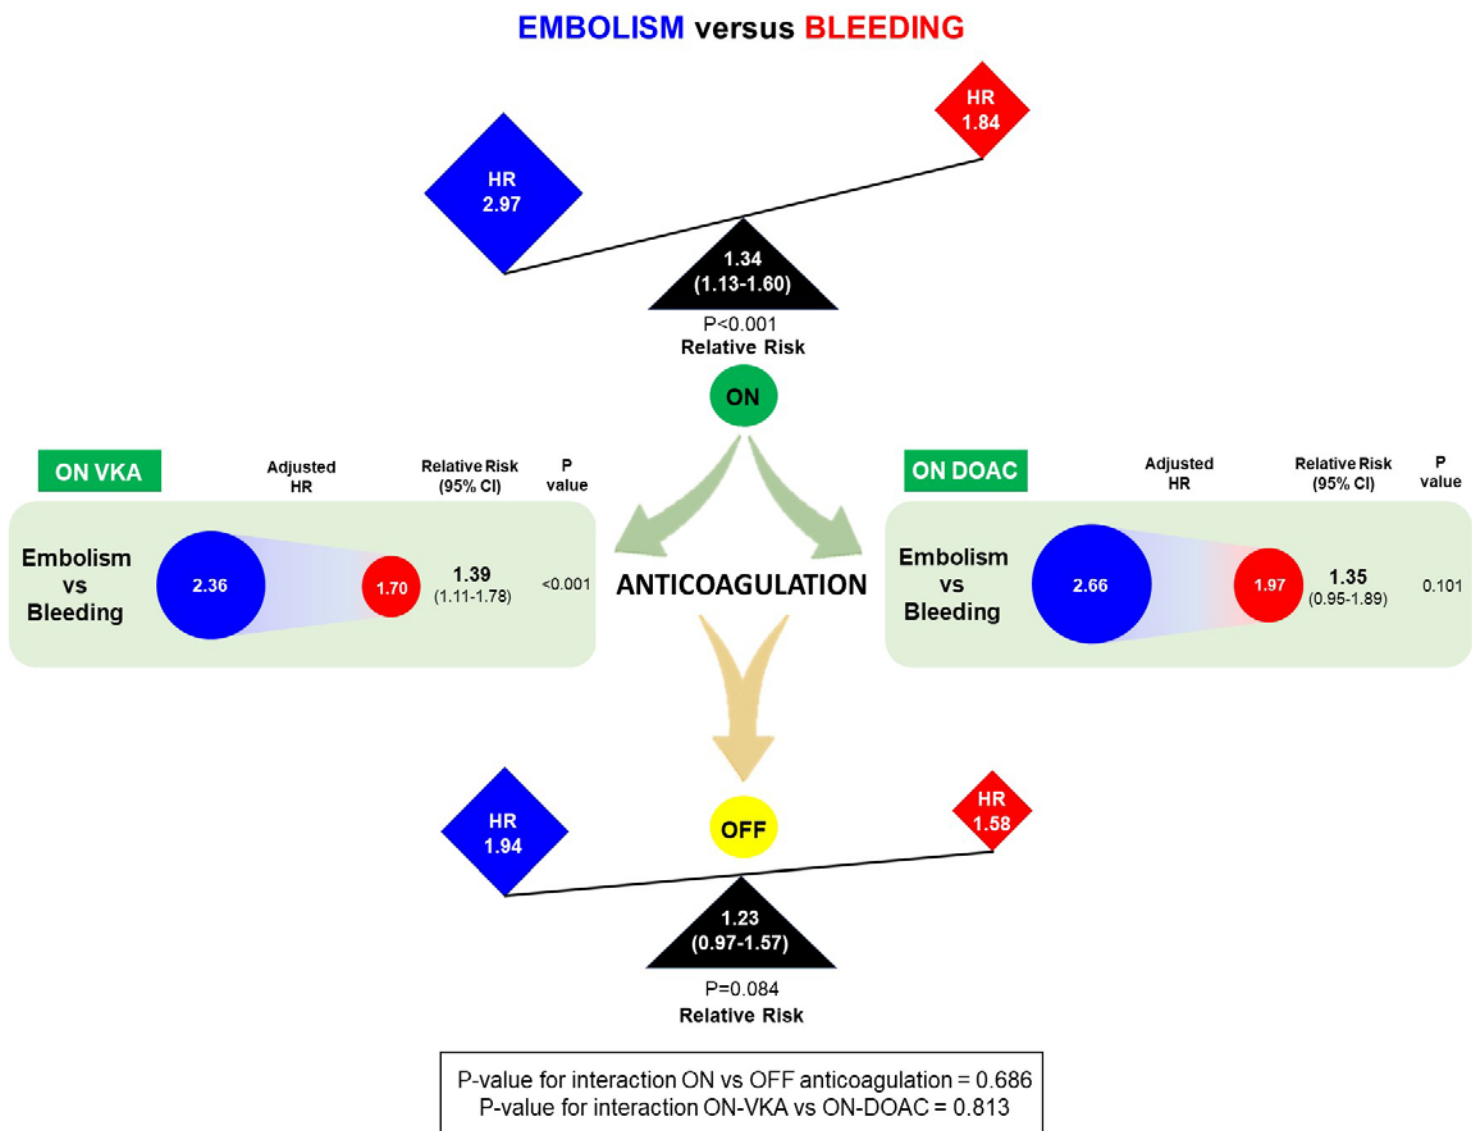

**Figure 2 of the supplementary data.** Differential impact of embolism and bleeding on mortality comparing treatment with vitamin K antagonists (on VKA) with treatment with direct oral anticoagulants (on DOAC). Blue rhombuses represent the magnitude (adjusted hazard ratio [HR]) of the impact on mortality of events on DOAC, while red rhombuses represent that of events on AVK. We report the estimate of the relative risk (ratio of the HR) for each comparison. The estimates of the impact of events on mortality are derived from a multivariate model (table 2). DOAC, direct oral anticoagulants; VKA, vitamin K antagonist.

**EMBOLIC EVENTS on DOAC versus EMBOLIC EVENTS on VKA**

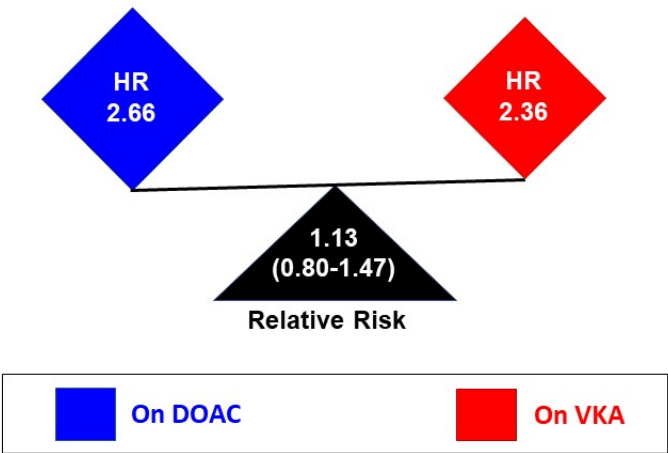

**BLEEDING EVENTS on DOAC versus BLEEDING EVENTS on VKA**

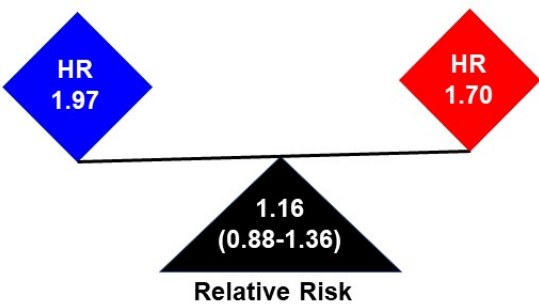

Supplement: mmc1 [file S1885585721000670:mmc1.pdf]
